# Supplementary material for: Individual versus superensemble forecasts of seasonal influenza outbreaks in the United States
Source: PubMed Central journal article supplement (PMC5690687; doi:10.1371/journal.pcbi.1005801), 2017-11-06
Supplement: pcbi.1005801.s001.pdf [file pcbi.1005801.s001.pdf]

1 **S1 Appendix. Additional details on forecast methods.**

2

3 **1 Model structures**

4 SIR model structure:

$$\frac{dS}{dt} = -\frac{\beta(t)IS}{N} - \alpha \quad (\text{S1})$$

$$\frac{dI}{dt} = \frac{\beta(t)IS}{N} + \alpha \quad (\text{S2})$$

5

6 SEIR model structure:

$$\frac{dS}{dt} = -\frac{\beta(t)IS}{N} - \alpha \quad (\text{S3})$$

$$\frac{dE}{dt} = \frac{\beta(t)IS}{N} - \frac{E}{Z} + \alpha \quad (\text{S4})$$

$$\frac{dI}{dt} = \frac{E}{Z} \quad (\text{S5})$$

7 where  $E$  is the number of exposed people, and  $Z$  is the mean latent period.

8

9 SEIRS model structure:

$$\frac{dS}{dt} = \frac{N - S - E - I}{L} - \frac{\beta(t)IS}{N} - \alpha \quad (\text{S6})$$

$$\frac{dE}{dt} = \frac{\beta(t)IS}{N} - \frac{E}{Z} + \alpha \quad (\text{S7})$$

$$\frac{dI}{dt} = \frac{E}{Z} - \frac{I}{D} \quad (\text{S8})$$

10 We assume a fixed  $\alpha$  of 0.1 infections per day, and use a population size of 100,000 people.

11

## 12 **2 Filter methods**

13 Each of the model-filter forecast systems described in the main text uses one of the four  
14 possible mathematical models of disease transmission (SIR, SEIR, SIRS or SEIRS), and one of  
15 five filter, or data assimilation, methods. The main features of the five filter methods are  
16 described here. For full descriptions of the filter algorithms and implementations, we refer  
17 readers to the original publications.

18

### 19 **2.1 Ensemble filter methods**

20 Ensemble filter methods use an ensemble of model simulations, in this study 300, with  
21 parameters and state variables randomly initialized and iteratively optimized following  
22 each weekly ILI+ observation in a prediction-update cycle. In the prediction step, state  
23 variables are propagated forward in time by the disease transmission model until the next  
24 ILI+ observation becomes available. In the update step, the filter algorithms adjust  
25 ensemble members in order to better match the observation. The updates applied to  
26 unobserved state variables are linear mappings from the update applied to the observed  
27 variable based on the prior ensemble covariance between the observed and unobserved  
28 variables.

29 The three ensemble filter methods differ in the calculation of the update of the observed  
30 variable (ILI+). In the ensemble Kalman filter (EKF)[1], the posterior of each model  
31 ensemble member is computed as the weighted average between the ensemble member  
32 and the ILI+ observation, with Gaussian random noise around the observation consistent  
33 with the observational error variance. The weights are determined according to the ratio of  
34 the overall ensemble prior variance to the observational error variance.

35 The ensemble adjustment Kalman filter (EAKF)[2] deterministically computes the update  
36 step such that the posterior ensemble mean and variance match the mean and variance  
37 predicted by Bayes theorem, assuming a Gaussian distribution.

38 While the EKF and the EAKF assume a Gaussian structure in prior and posterior ensemble  
39 distributions and observations, the rank histogram filter (RHF)[3] relaxes these  
40 assumptions and allows for non-Gaussian structures. Instead, an approximate continuous  
41 prior distribution is constructed using a rank histogram of ensemble prior values of ILI+.

42 This non-Gaussian prior is multiplied by the observational likelihood at each point and  
43 normalized, resulting in a continuous non-Gaussian posterior distribution.

44 A multiplicative inflation factor of 1.02 is added to the three ensemble filters to counter  
45 filter divergence. [2]

46

## 47 **2.2 Particle filter methods**

48 Particle filters represent state space with a set of particles, in this case 10,000. As with the  
49 ensemble filters, we couple the filter with a disease transmission model, which propagates  
50 the particles forward in time in a prediction step. The filter then assimilates the next ILI+  
51 observation in an update step. The update step in the basic particle filter (PF)[4] weights  
52 particles according to their likelihood. Resampling and regularization improve the  
53 performance of the PF by expanding the range of parameter and state space, and decreasing  
54 redundancies.

55 The second particle filter is the particle Markov Chain Monte Carlo filter (pMCMC),  
56 specifically the particle marginal Metropolis-Hasting sampler described in Andrieu et al.[5],  
57 which combines Markov Chain Monte Carlo (MCMC) and sequential Monte Carlo (SMC)  
58 methods. While traditional SMC methods require sampling the entire state-parameter  
59 space of a model, the pMCMC simplifies the problem to sampling only parameter space. The  
60 pMCMC proposes a set of set of parameters, and then estimates state variables given the  
61 parameter proposal. The acceptance probability of the proposal is a function of the joint  
62 likelihood of the observed ILI+ data. Unlike the other four filters, in which parameters may  
63 be non-stationary in time, the pMCMC optimizes a fixed set of parameters over the entire  
64 observational time series.

65 **References**

- 66 1. Burgers G, Jan van Leeuwen P, Evensen G. Analysis scheme in the ensemble  
67 Kalman filter. Monthly weather review. 1998;126(6):1719-24.
- 68 2. Anderson JL. An ensemble adjustment Kalman filter for data assimilation.  
69 Monthly weather review. 2001;129(12):2884-903.
- 70 3. Anderson JL. A non-Gaussian ensemble filter update for data assimilation.  
71 Monthly Weather Review. 2010;138(11):4186-98.
- 72 4. Arulampalam MS, Maskell S, Gordon N, Clapp T. A tutorial on particle filters  
73 for online nonlinear/non-Gaussian Bayesian tracking. IEEE Transactions on signal  
74 processing. 2002;50(2):174-88.
- 75 5. Andrieu C, Doucet A, Holenstein R. Particle markov chain monte carlo  
76 methods. Journal of the Royal Statistical Society: Series B (Statistical Methodology).  
77 2010;72(3):269-342.
- 78

79
